# Supplementary material for: Polyelectrolyte Threading through a Nanopore
Source: Polymers (Basel). 2016 Mar 3;8(3):73. doi: 10.3390/polym8030073 (PMC6432567; doi:10.3390/polym8030073)
Supplement: Supplementary file 1 [file polymers-08-00073-s001.pdf]

# Supplementary Materials: Polyelectrolyte Threading through a Nanopore

Pai-Yi Hsiao

The probability distribution of translocation time  $P(\tau)$  is a single-peak function (Figure S1). The peak is lowered and broadened as the chain length  $N$  increases. At a given  $N$ , the distribution becomes sharper with increasing  $E$ .

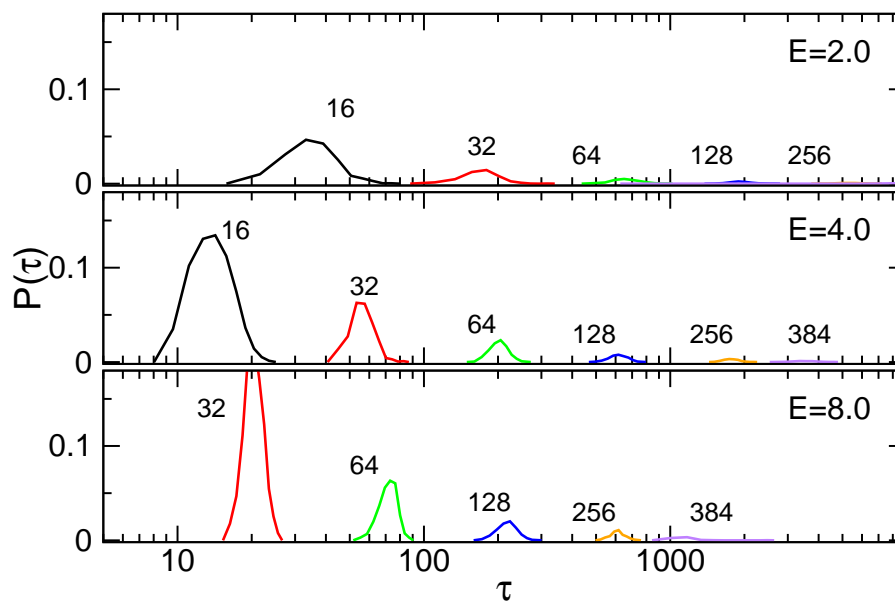

**Figure S1.** Probability distribution  $P(\tau)$  of translocation time at  $E = 2.0, 4.0$ , and  $8.0$ . The chain length  $N$  is indicated near the curves.

How the chain size  $\langle R_g \rangle$ , the  $z$ -coordinates of chain end  $\langle z_1 \rangle$ ,  $\langle z_N \rangle$ , the number of condensed counterions  $\langle N_c^{(+1)} \rangle$ , and the fraction of charge neutralization  $\langle |Q_c/Ne| \rangle$  depend on the chain length  $N$  can be seen through a comparison of the cases (a)  $N = 128$ , (b)  $N = 256$ , (c)  $N = 384$  in Figures S2–S4. The results show similar trend of variation during a translocation process, for different chain lengths.

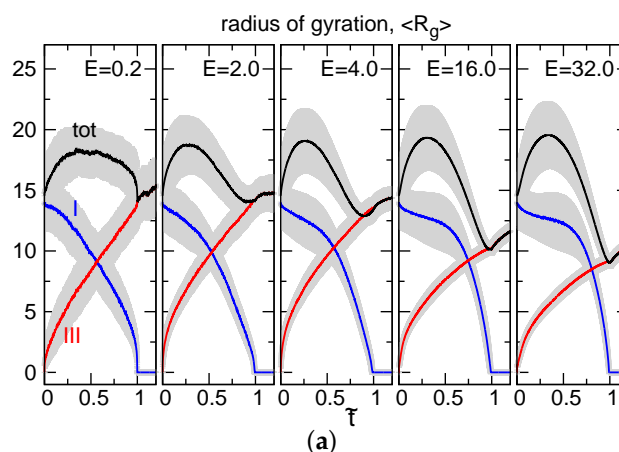

**Figure S2.** Cont.

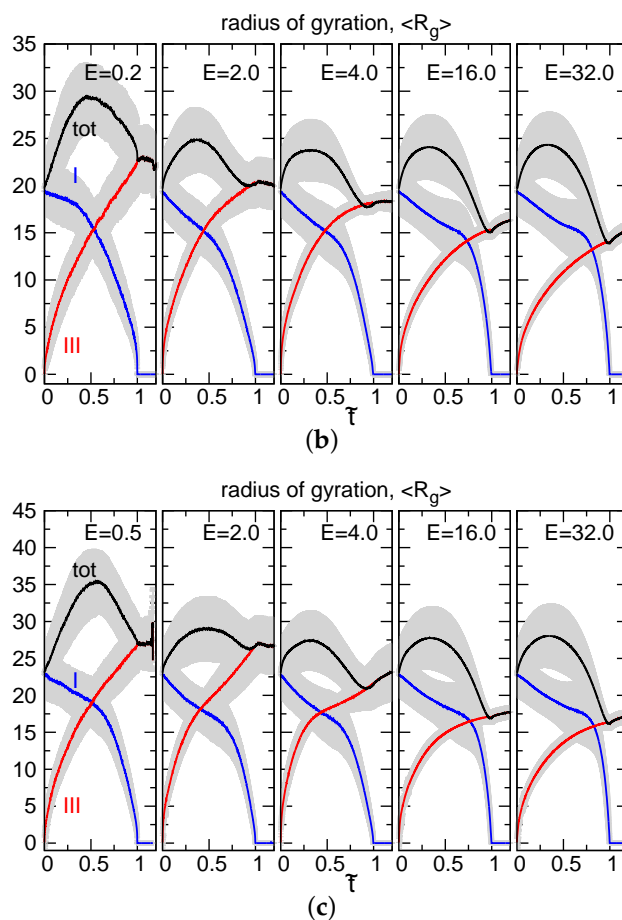

**Figure S2.** Variation of  $\langle R_g \rangle$  in the cis- (I), the trans- (III), and the whole (tot) region at different  $E$  fields, for (a)  $N = 128$ ; (b)  $N = 256$ ; and (c)  $N = 384$ . The gray-colored region denotes the error of a curve.

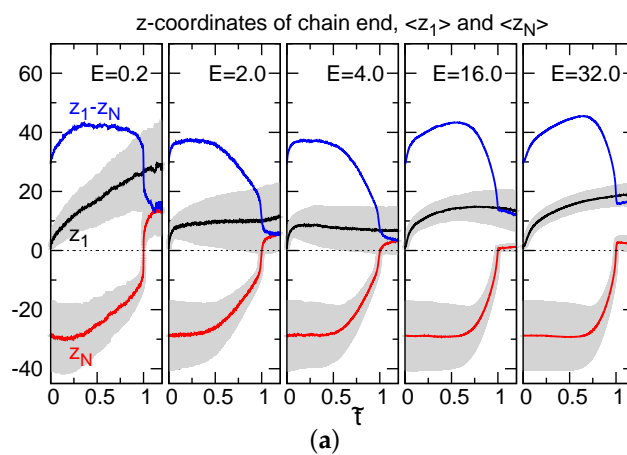

**Figure S3.** Cont.

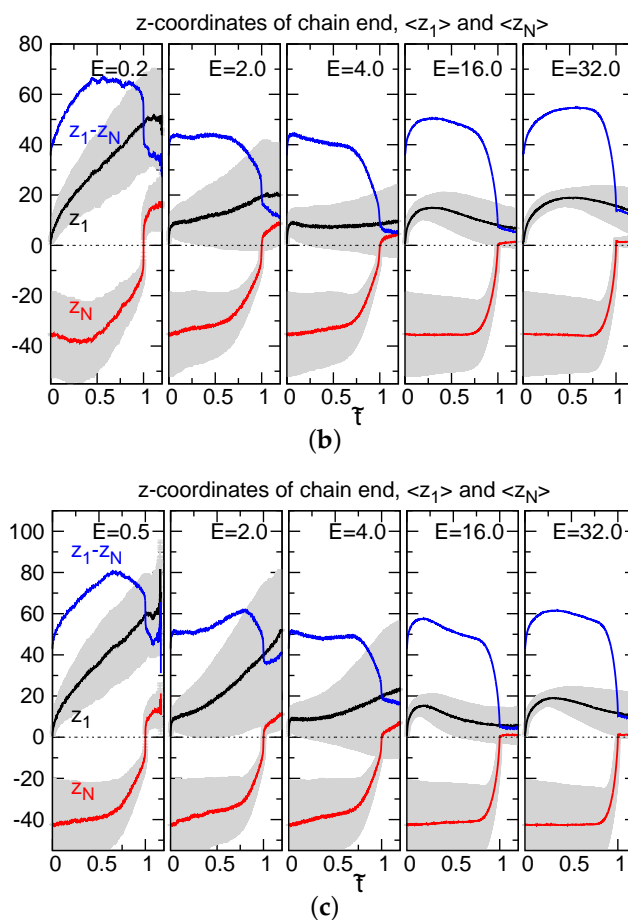

**Figure S3.** Averaged z-coordinates of chain end,  $\langle z_1 \rangle$  and  $\langle z_N \rangle$ , and the difference  $\langle z_1 - z_N \rangle$ , as a function of  $\tilde{t}$  at different field strength for (a)  $N = 128$ ; (b)  $N = 256$ ; and (c)  $N = 384$ .

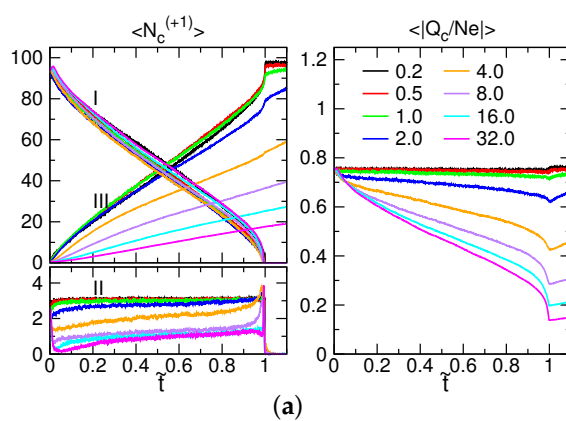

**Figure S4.** Cont.

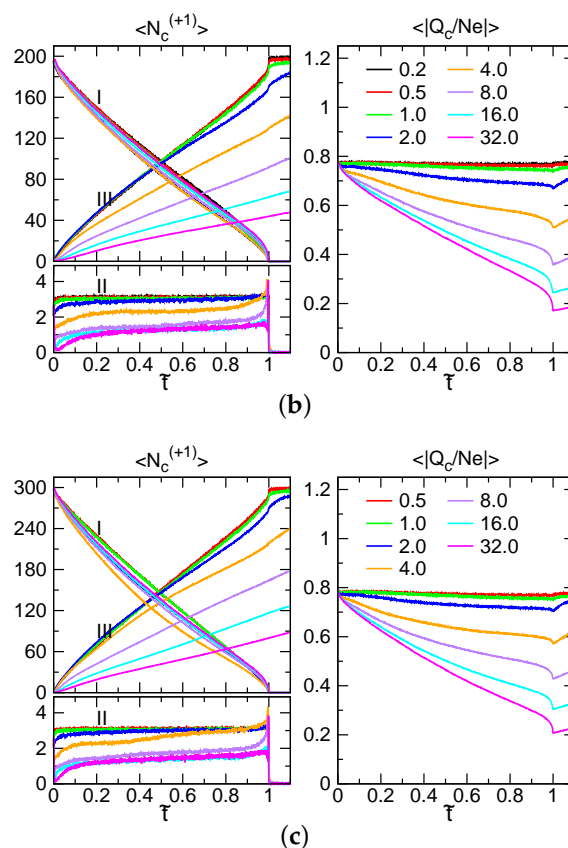

**Figure S4.** (Left) Variations of mean number of condensed counterions  $N_c^{(+1)}$  in the cis-region (I), the pore-region (II), and the trans-region (III) for (a)  $N = 128$ ; (b)  $N = 256$ ; and (c)  $N = 384$ . (Right) Fraction of charges neutralized on the chain,  $\langle |Q_c/Ne| \rangle$ , during a translocation process for (a)  $N = 128$ ; (b)  $N = 256$ ; and (c)  $N = 384$ . The field strength  $E$  is indicated in the legend.

The zigzagged curves of the translocation coordinate  $N_{m,III}$  show diffusion characteristics of translocation when the chain threads through the pore (in Figure S5). In contrast, the variation of the averaged translocation coordinate  $\langle N_{m,III} \rangle$  is a smooth, monotonically increased function. It depicts the drifting behavior of the chain forced by the applied electric field.

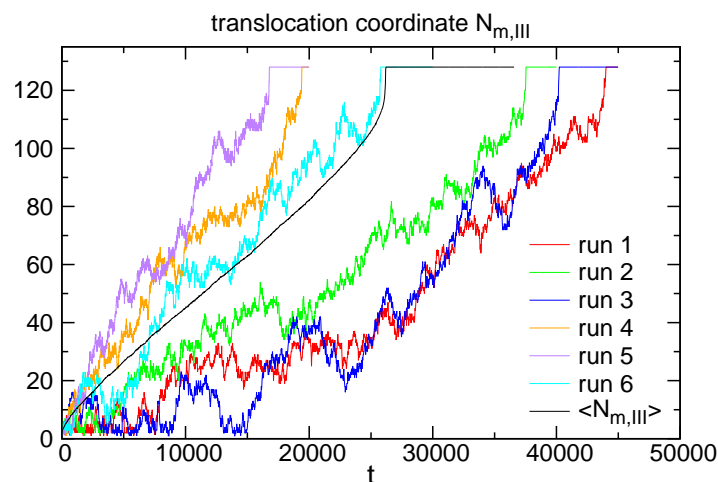

**Figure S5.** Variation of translocation coordinate for  $N = 128$  at  $E = 0.2$ : raw data (run 1 – run 6) vs. the averaged behavior  $\langle N_{m,III} \rangle$
